# Supplementary material for: Haptoglobin Attenuates Cerebrospinal Fluid Hemoglobin-Induced Neurological Deterioration in Sheep
Source: Springer Nature journal article supplement (doi:10.1007/s12975-024-01254-9), 2024-04-23
Supplement: MOESM1 [file 27007910]

## Supplemental Tables

**Supplemental Table 1. Sheep neurological health evaluation matrix.** Description of grading parameters for alertness, gait, posture, appetite, respiration, and pain response.

| Score | Alertness                               | Gait                                                | Posture                                                  | Appetite                              | Respiration                                                         | Pain                                                                                                                        |
|-------|-----------------------------------------|-----------------------------------------------------|----------------------------------------------------------|---------------------------------------|---------------------------------------------------------------------|-----------------------------------------------------------------------------------------------------------------------------|
| 1     | Not responsive, apathetic               | Severely abnormal or no weight bearing              | Lying, not standing even when forced; great difficulties | Not eating                            | Severely abnormal breathing pattern/frequency, strong pumping       | Severe pain: constant teeth grinding, hanging ears, frequent flehming, partial/complete eyelid closure, inappetence         |
| 2     | Responsive, but not interested          | Moderately to severely abnormal weight bearing/gait | Lying, but stands when forced; unstable and immobile     | Eating hesitantly and discontinuously | Moderate to severe abnormal breathing pattern/frequency and pumping | Moderate/severe pain: frequent teeth grinding, flehming, reaction to slight touch at wound area                             |
| 3     | Less interested in environment          | Moderately abnormal weight bearing/gait             | Lying, but stands immediately; unstable, moves slowly    | Moderately reduced appetite           | Moderately abnormal breathing pattern/frequency                     | Moderate pain: intermittent teeth grinding, partial eyelid closure, occasional flehming, reaction to pressure at wound area |
| 4     | Slightly less interested in environment | Slightly abnormal weight bearing/gait               | Lying more often than normal, moves slowly               | Slightly reduced appetite             | Slightly abnormal breathing pattern/frequency                       | Mild pain: slight signs of discomfort, slight reaction to pressure at wound area                                            |
| 5     | Normal, interested in environment       | Normal weight bearing/gait                          | Normal physiological posture                             | Normal appetite                       | Normal breathing pattern/frequency                                  | No pain, normal general condition                                                                                           |
