# Supplementary material for: Haptoglobin Attenuates Cerebrospinal Fluid Hemoglobin-Induced Neurological Deterioration in Sheep
Source: Springer Nature journal article supplement (doi:10.1007/s12975-024-01254-9), 2024-04-23
Supplement: MOESM2 [file 27007910]

## Supplemental Figures

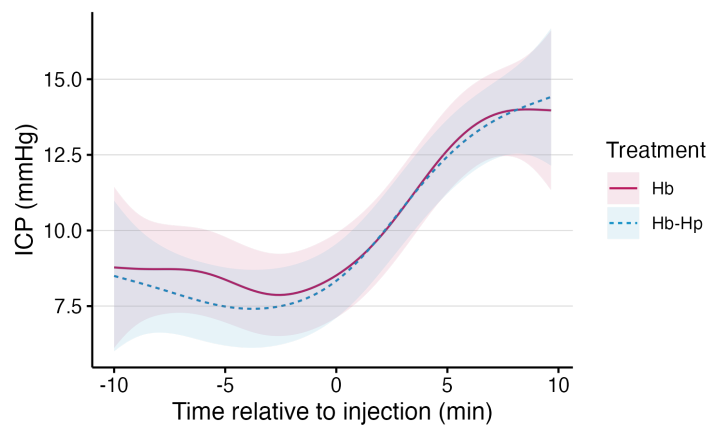

**Supplemental Figure 1. Injection control and ventricular volume evaluation.** Changes in ICP during the first injection timepoint in both groups.

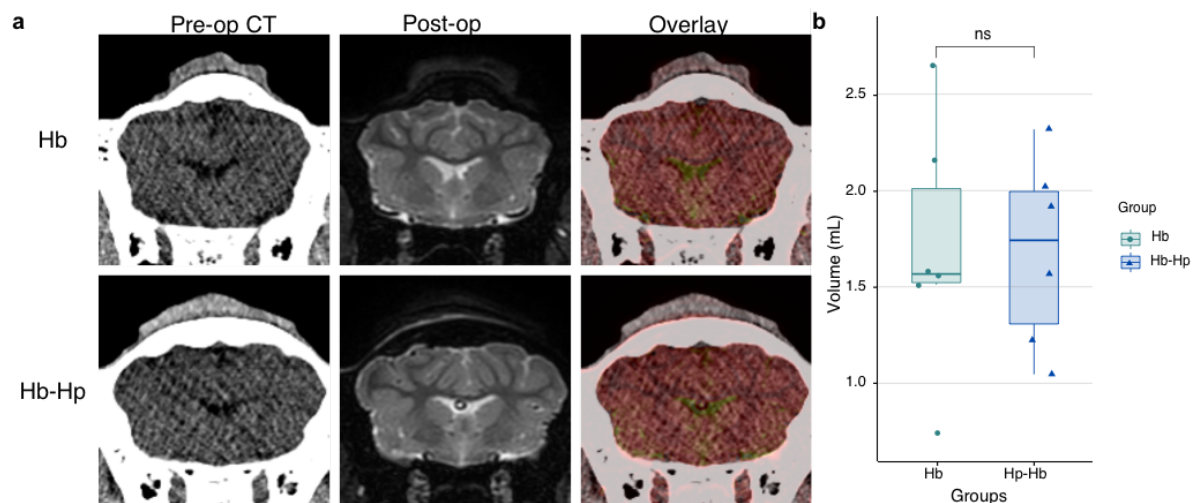

**Supplemental Figure 2. Visual comparison of ventricular imaging in representative animals.** (a) Registered pre- (CT, left column) and post-operative (T2, middle column) imaging and both overlaid (right column) of the lateral ventricles. (b) Volumetric comparison of ventricular CSF on the post-operative T2.

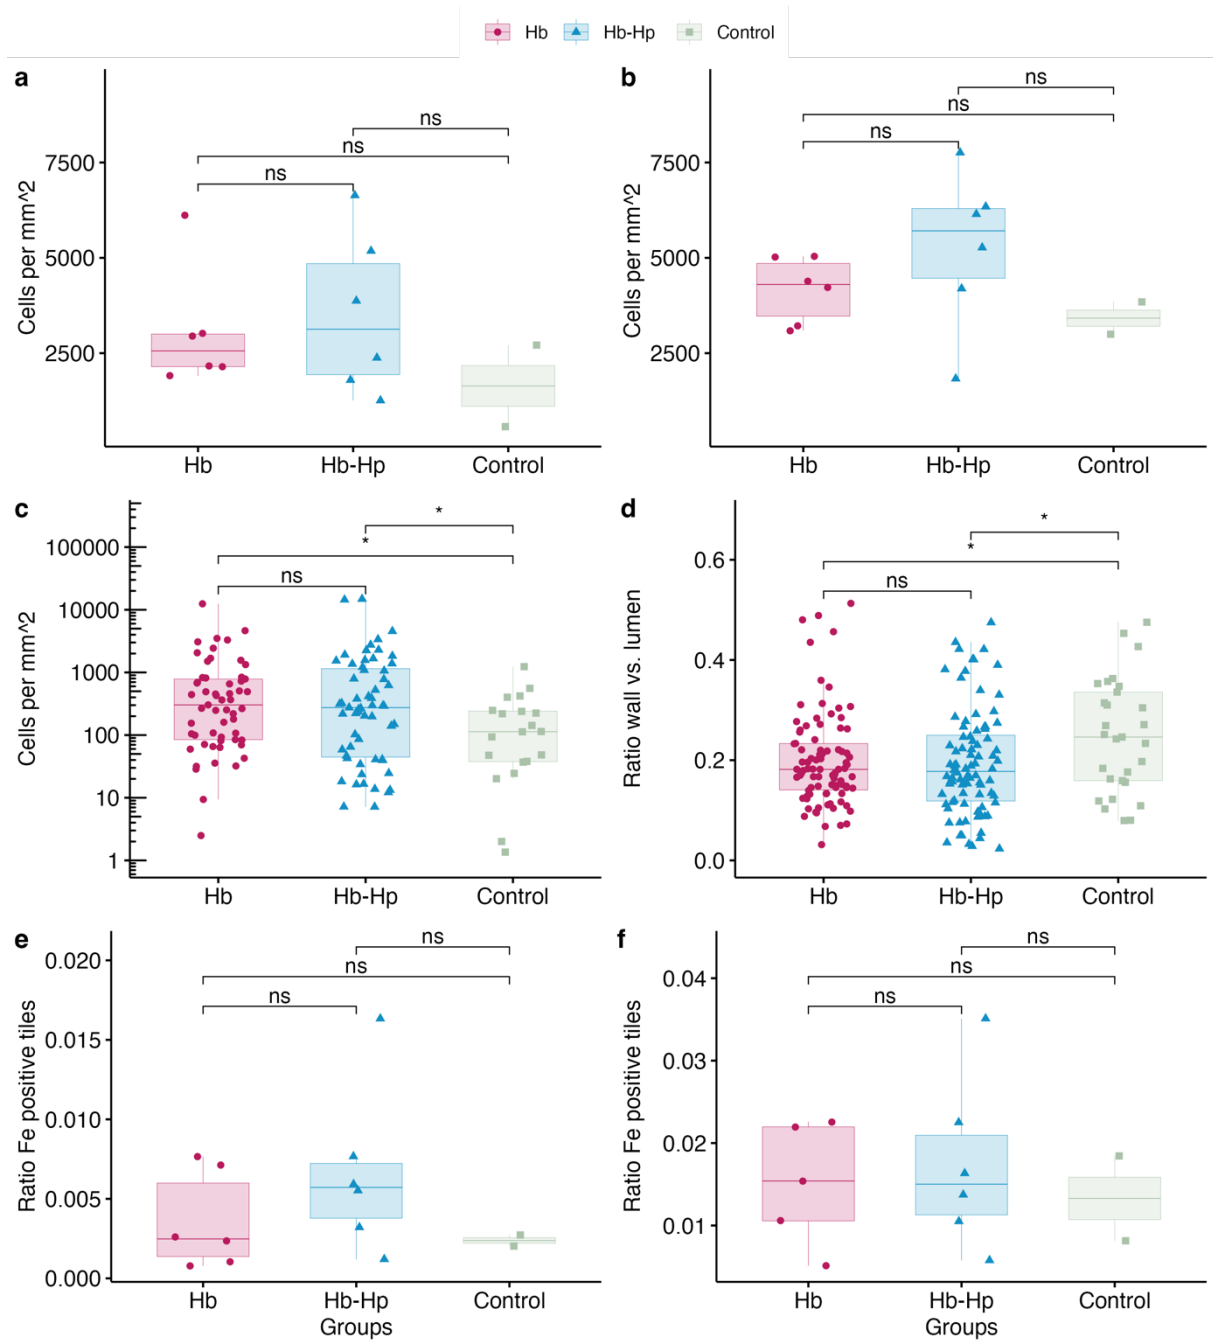

**Supplemental Figure 3. Histological stainings.** (a) Inflammatory cells stained by Iba1 in a standardized anatomical region of interest and in (b) the periventricular area. Smooth muscle cells stained by SMA indicating the (c) positively stained cells in the perivascular cuff and the (d) surface ratio of arteriolar wall in comparison to arteriolar lumen. DAB-enhanced iron staining of 10x10  $\mu\text{m}^2$  tiles, highlighting the ratio of positive cells in (e) the parenchyma and (f) the periventricular area.
